# Supplementary material
Source: HighWire-hosted journal article supplement (https://bibliotheek.ehb.be:2666/highwire/filestream/164803/field_highwire_adjunct_files/6/bmjqs-2024-017434supp007_data_supplement.pdf)
Supplement: bmjqs-2024-017434supp007_data_supplement.pdf [file bmjqs-2024-017434supp007_data_supplement.pdf]

**Appendix 7: Item characteristics per medical condition - outpatient sample**

**Article:** Through the patients' eyes - Psychometric evaluation of the Experienced Patient-Centeredness Questionnaire (EPAT-64)

**Abbreviations:**

- Card = Cardiovascular diseases
- Mus = Musculoskeletal diseases
- Ment = Mental disorders

Dimension “Essential characteristics of the clinicians”

|        |                                                                                                                                                                                     | mean |      |        |     |      | standard deviation |      |        |     |      |
|--------|-------------------------------------------------------------------------------------------------------------------------------------------------------------------------------------|------|------|--------|-----|------|--------------------|------|--------|-----|------|
| Item   |                                                                                                                                                                                     | All  | Card | Cancer | Mus | Ment | All                | Card | Cancer | Mus | Ment |
| Item 1 | The healthcare professionals were sensitive (for example they addressed my feelings, showed understanding, or empathized with my situation).                                        | 5.1  | 5.1  | 5.1    | 4.8 | 5.1  | 1.2                | 1.2  | 1.2    | 1.5 | 1.2  |
| Item 2 | The healthcare professionals behaved respectfully and appreciatively.                                                                                                               | 5.5  | 5.6  | 5.6    | 5.3 | 5.6  | 0.9                | 0.8  | 0.7    | 1.1 | 0.7  |
| Item 3 | The healthcare professionals were committed to finding a solution for my health concerns.                                                                                           | 5.2  | 5.3  | 5.3    | 5.0 | 5.3  | 1.1                | 1.0  | 1.0    | 1.3 | 1.0  |
| Item 4 | If I wanted to, difficult topics were discussed directly and openly by the healthcare professionals (for example, long-term effects of the illness, life expectancy, or sexuality). | 4.8  | 4.7  | 4.9    | 4.4 | 4.9  | 1.5                | 1.6  | 1.4    | 1.6 | 1.4  |

|        |  | Item difficulty |      |        |      |      | 'does not concern me' |       |        |       |       | no reply |      |        |      |      | item total correlation |      |        |      |      |
|--------|--|-----------------|------|--------|------|------|-----------------------|-------|--------|-------|-------|----------|------|--------|------|------|------------------------|------|--------|------|------|
|        |  | All             | Card | Cancer | Mus  | Ment | All                   | Card  | Cancer | Mus   | Ment  | All      | Card | Cancer | Mus  | Ment | All                    | Card | Cancer | Mus  | Ment |
| Item 1 |  | 82.1            | 81.5 | 82.2   | 75.2 | 82.2 | 4.2%                  | 8.3%  | 4.4%   | 2.8%  | 4.4%  | 1.1%     | 1.4% | 1.8%   | 0.5% | 1.8% | 0.80                   | 0.73 | 0.76   | 0.88 | 0.76 |
| Item 2 |  | 90.8            | 91.5 | 92.8   | 86.3 | 92.8 | 0.7%                  | 1.1%  | 0.7%   | 0.0%  | 0.7%  | 0.7%     | 0.4% | 1.5%   | 0.5% | 1.5% | 0.73                   | 0.69 | 0.65   | 0.83 | 0.65 |
| Item 3 |  | 85.0            | 86.4 | 86.7   | 80.2 | 86.7 | 4.5%                  | 10.1% | 5.1%   | 1.4%  | 5.1%  | 0.8%     | 0.4% | 1.5%   | 0.5% | 1.5% | 0.80                   | 0.78 | 0.76   | 0.86 | 0.76 |
| Item 4 |  | 76.9            | 74.7 | 78.6   | 68.2 | 78.6 | 32.8%                 | 42.2% | 27.8%  | 36.4% | 27.8% | 1.1%     | 0.7% | 2.2%   | 0.5% | 2.2% | 0.71                   | 0.66 | 0.71   | 0.80 | 0.71 |

Dimension “Clinician-patient relationship”

| Item                                                                                                         | mean |      |        |     |      | standard deviation |      |        |     |      |
|--------------------------------------------------------------------------------------------------------------|------|------|--------|-----|------|--------------------|------|--------|-----|------|
|                                                                                                              | All  | Card | Cancer | Mus | Ment | All                | Card | Cancer | Mus | Ment |
| Item 1 I trusted my healthcare professionals.                                                                | 5.2  | 5.3  | 5.3    | 5.0 | 5.3  | 1.1                | 1.1  | 1.0    | 1.3 | 1.0  |
| Item 2 I felt I could confide in my healthcare professionals (for example, on intimate or difficult topics). | 4.9  | 4.8  | 4.8    | 4.5 | 4.8  | 1.4                | 1.5  | 1.3    | 1.6 | 1.3  |
| Item 3 The healthcare professionals knew about my medical history and my current health status.              | 5.1  | 5.2  | 5.3    | 4.8 | 5.3  | 1.2                | 1.1  | 0.9    | 1.4 | 0.9  |
| Item 4 Existing complaints were addressed again in follow-up meetings.                                       | 5.0  | 4.8  | 5.1    | 4.7 | 5.1  | 1.3                | 1.5  | 1.2    | 1.5 | 1.2  |

|        | Item difficulty |      |        |      |      | 'does not concern me' |       |        |       |       | no reply |      |        |      |      | item total correlation |      |        |      |      |
|--------|-----------------|------|--------|------|------|-----------------------|-------|--------|-------|-------|----------|------|--------|------|------|------------------------|------|--------|------|------|
|        | All             | Card | Cancer | Mus  | Ment | All                   | Card  | Cancer | Mus   | Ment  | All      | Card | Cancer | Mus  | Ment | All                    | Card | Cancer | Mus  | Ment |
| Item 1 | 84.8            | 86.0 | 86.1   | 79.2 | 86.1 | 1.8%                  | 4.7%  | 0.4%   | 0.9%  | 0.4%  | 1.2%     | 1.1% | 1.5%   | 0.9% | 1.5% | 0.77                   | 0.70 | 0.78   | 0.82 | 0.78 |
| Item 2 | 77.8            | 76.0 | 77.0   | 70.7 | 77.0 | 12.8%                 | 26.7% | 10.6%  | 11.5% | 10.6% | 1.0%     | 0.7% | 1.5%   | 0.5% | 1.5% | 0.75                   | 0.71 | 0.74   | 0.79 | 0.74 |
| Item 3 | 82.2            | 83.0 | 86.2   | 77.0 | 86.2 | 3.8%                  | 6.5%  | 1.1%   | 2.3%  | 1.1%  | 0.5%     | 0.0% | 1.1%   | 0.5% | 1.1% | 0.57                   | 0.56 | 0.55   | 0.65 | 0.55 |
| Item 4 | 79.2            | 75.2 | 81.7   | 74.0 | 81.7 | 23.0%                 | 33.6% | 21.2%  | 15.2% | 21.2% | 0.7%     | 0.4% | 1.5%   | 0.5% | 1.5% | 0.68                   | 0.59 | 0.63   | 0.77 | 0.63 |

Dimension “Patient as a unique person”

|        |                                                                                                        | mean |      |        |     |      | standard deviation |      |        |     |      |
|--------|--------------------------------------------------------------------------------------------------------|------|------|--------|-----|------|--------------------|------|--------|-----|------|
| Item   |                                                                                                        | All  | Card | Cancer | Mus | Ment | All                | Card | Cancer | Mus | Ment |
| Item 1 | My wishes, needs and expectations were asked and taken into account in the treatment.                  | 4.8  | 4.7  | 4.7    | 4.5 | 4.7  | 1.4                | 1.4  | 1.4    | 1.6 | 1.4  |
| Item 2 | My healthcare professionals addressed me personally and did not treat me as just one of many patients. | 5.1  | 5.1  | 5.1    | 4.8 | 5.1  | 1.2                | 1.1  | 1.2    | 1.4 | 1.2  |
| Item 3 | My personal health goals were asked and taken into account.                                            | 4.1  | 3.7  | 3.8    | 3.9 | 3.8  | 1.8                | 1.9  | 1.7    | 1.8 | 1.7  |
| Item 4 | It was asked and taken into account what opportunities and skills I can provide to support my health.  | 3.7  | 3.2  | 3.4    | 3.6 | 3.4  | 1.8                | 1.8  | 1.8    | 1.9 | 1.8  |

|        |  | Item difficulty |      |        |      |      | 'does not concern me' |       |        |       |       | no reply |      |        |      |      | item total correlation |      |        |      |      |
|--------|--|-----------------|------|--------|------|------|-----------------------|-------|--------|-------|-------|----------|------|--------|------|------|------------------------|------|--------|------|------|
|        |  | All             | Card | Cancer | Mus  | Ment | All                   | Card  | Cancer | Mus   | Ment  | All      | Card | Cancer | Mus  | Ment | All                    | Card | Cancer | Mus  | Ment |
| Item 1 |  | 75.1            | 74.5 | 73.3   | 69.5 | 73.3 | 8.3%                  | 14.1% | 10.6%  | 3.7%  | 10.6% | 0.8%     | 1.1% | 0.7%   | 1.4% | 0.7% | 0.77                   | 0.71 | 0.74   | 0.88 | 0.74 |
| Item 2 |  | 82.1            | 82.6 | 82.0   | 76.8 | 82.0 | 2.0%                  | 4.0%  | 1.8%   | 0.5%  | 1.8%  | 0.5%     | 0.0% | 0.7%   | 1.4% | 0.7% | 0.66                   | 0.55 | 0.62   | 0.78 | 0.62 |
| Item 3 |  | 62.4            | 54.4 | 55.1   | 58.9 | 55.1 | 12.5%                 | 23.5% | 13.9%  | 7.4%  | 13.9% | 0.7%     | 0.7% | 0.4%   | 1.4% | 0.4% | 0.76                   | 0.73 | 0.74   | 0.81 | 0.74 |
| Item 4 |  | 54.9            | 44.5 | 48.4   | 51.8 | 48.4 | 17.7%                 | 31.8% | 17.6%  | 12.4% | 17.6% | 0.7%     | 0.4% | 0.7%   | 1.4% | 0.7% | 0.72                   | 0.68 | 0.73   | 0.74 | 0.73 |

Dimension “Biopsychosocial perspective”

|        |                                                                                                                                                                                               | mean |      |        |     |      | standard deviation |      |        |     |      |
|--------|-----------------------------------------------------------------------------------------------------------------------------------------------------------------------------------------------|------|------|--------|-----|------|--------------------|------|--------|-----|------|
| Item   |                                                                                                                                                                                               | All  | Card | Cancer | Mus | Ment | All                | Card | Cancer | Mus | Ment |
| Item 1 | My entire personal life was taken into account during the treatment (for example, job, family and friends, partnership and sexuality, culture and religion, age, or financial circumstances). | 3.9  | 3.2  | 3.5    | 3.4 | 3.5  | 1.8                | 1.8  | 1.8    | 1.8 | 1.8  |
| Item 2 | I was asked how my condition affects my life.                                                                                                                                                 | 4.0  | 4.1  | 3.5    | 3.4 | 3.5  | 1.8                | 1.8  | 1.8    | 1.9 | 1.8  |
| Item 3 | My entire medical history was asked and taken into account.                                                                                                                                   | 4.9  | 4.9  | 4.8    | 4.6 | 4.8  | 1.4                | 1.4  | 1.5    | 1.5 | 1.5  |
| Item 4 | I was informed about the interaction of physical, psychological, and social factors.                                                                                                          | 3.4  | 2.6  | 3.3    | 2.9 | 3.3  | 1.9                | 1.8  | 1.8    | 1.9 | 1.8  |

|        |  | Item difficulty |      |        |      |      | 'does not concern me' |       |        |       |       | no reply |      |        |      |      | item total correlation |      |        |      |      |
|--------|--|-----------------|------|--------|------|------|-----------------------|-------|--------|-------|-------|----------|------|--------|------|------|------------------------|------|--------|------|------|
|        |  | All             | Card | Cancer | Mus  | Ment | All                   | Card  | Cancer | Mus   | Ment  | All      | Card | Cancer | Mus  | Ment | All                    | Card | Cancer | Mus  | Ment |
| Item 1 |  | 57.0            | 43.9 | 49.4   | 48.6 | 49.4 | 16.1%                 | 28.9% | 18.3%  | 12.4% | 18.3% | 1.2%     | 1.8% | 1.8%   | 0.5% | 1.8% | 0.77                   | 0.72 | 0.80   | 0.78 | 0.80 |
| Item 2 |  | 60.9            | 61.6 | 50.4   | 48.9 | 50.4 | 10.1%                 | 17.3% | 10.6%  | 8.8%  | 10.6% | 1.6%     | 1.8% | 1.5%   | 0.9% | 1.5% | 0.74                   | 0.64 | 0.74   | 0.73 | 0.74 |
| Item 3 |  | 77.1            | 78.2 | 76.0   | 71.3 | 76.0 | 7.9%                  | 13.7% | 9.9%   | 3.7%  | 9.9%  | 1.5%     | 1.8% | 2.2%   | 0.5% | 2.2% | 0.60                   | 0.56 | 0.56   | 0.59 | 0.56 |
| Item 4 |  | 47.6            | 32.9 | 45.8   | 37.3 | 45.8 | 20.2%                 | 36.5% | 16.5%  | 16.1% | 16.5% | 1.1%     | 1.4% | 1.8%   | 0.5% | 1.8% | 0.73                   | 0.68 | 0.74   | 0.72 | 0.74 |

Dimension “Clinician-patient communication”

|        |                                                                                                                      | mean |      |        |     |      | standard deviation |      |        |     |      |
|--------|----------------------------------------------------------------------------------------------------------------------|------|------|--------|-----|------|--------------------|------|--------|-----|------|
| Item   |                                                                                                                      | All  | Card | Cancer | Mus | Ment | All                | Card | Cancer | Mus | Ment |
| Item 1 | I was given enough time to describe my concerns and my situation (for example, medical history or current symptoms). | 5.3  | 5.3  | 5.4    | 5.1 | 5.4  | 1.1                | 1.2  | 0.9    | 1.3 | 0.9  |
| Item 2 | The healthcare professionals used terms that were easy to understand.                                                | 5.4  | 5.2  | 5.3    | 5.3 | 5.3  | 1.0                | 1.0  | 0.9    | 1.1 | 0.9  |
| Item 3 | The healthcare professionals looked at me and listened carefully during our conversation.                            | 5.5  | 5.4  | 5.5    | 5.2 | 5.5  | 0.9                | 1.0  | 0.8    | 1.2 | 0.8  |
| Item 4 | The healthcare professionals ensured that I understood correctly what was explained to me.                           | 5.0  | 5.1  | 5.1    | 4.5 | 5.1  | 1.3                | 1.2  | 1.1    | 1.6 | 1.1  |

|        |  | Item difficulty |      |        |      |      | 'does not concern me' |      |        |      |      | no reply |      |        |      |      | item total correlation |      |        |      |      |
|--------|--|-----------------|------|--------|------|------|-----------------------|------|--------|------|------|----------|------|--------|------|------|------------------------|------|--------|------|------|
|        |  | All             | Card | Cancer | Mus  | Ment | All                   | Card | Cancer | Mus  | Ment | All      | Card | Cancer | Mus  | Ment | All                    | Card | Cancer | Mus  | Ment |
| Item 1 |  | 86.3            | 85.9 | 87.9   | 81.1 | 87.9 | 2.6%                  | 5.1% | 2.2%   | 2.3% | 2.2% | 1.0%     | 2.5% | 1.1%   | 0.5% | 1.1% | 0.73                   | 0.74 | 0.67   | 0.81 | 0.67 |
| Item 2 |  | 87.4            | 84.8 | 85.6   | 86.3 | 85.6 | 0.8%                  | 1.8% | 0.4%   | 0.5% | 0.4% | 0.8%     | 1.1% | 0.7%   | 0.9% | 0.7% | 0.58                   | 0.64 | 0.58   | 0.60 | 0.58 |
| Item 3 |  | 89.9            | 88.7 | 90.7   | 83.6 | 90.7 | 0.4%                  | 0.4% | 0.4%   | 0.5% | 0.4% | 0.5%     | 0.7% | 0.7%   | 0.5% | 0.7% | 0.77                   | 0.79 | 0.73   | 0.81 | 0.73 |
| Item 4 |  | 79.6            | 81.2 | 81.9   | 70.1 | 81.9 | 5.2%                  | 6.1% | 4.8%   | 4.6% | 4.8% | 0.9%     | 1.8% | 1.1%   | 0.9% | 1.1% | 0.67                   | 0.73 | 0.67   | 0.65 | 0.67 |

Dimension “Integration of medical and non-medical care”

|        |                                                                                                                                                                                                      | mean |      |        |     |      | standard deviation |      |        |     |      |
|--------|------------------------------------------------------------------------------------------------------------------------------------------------------------------------------------------------------|------|------|--------|-----|------|--------------------|------|--------|-----|------|
| Item   |                                                                                                                                                                                                      | All  | Card | Cancer | Mus | Ment | All                | Card | Cancer | Mus | Ment |
| Item 1 | I was asked if I use or would like to use additional services (for example, support groups, counseling, health courses, complementary and alternative medicine, or spiritual support/pastoral care). | 3.1  | 2.3  | 3.0    | 2.6 | 3.0  | 2.0                | 1.9  | 1.9    | 1.8 | 1.9  |
| Item 2 | If I used or wanted to use additional services, it was accepted.                                                                                                                                     | 4.5  | 3.4  | 4.4    | 4.5 | 4.4  | 1.8                | 2.1  | 1.9    | 1.7 | 1.9  |
| Item 3 | The healthcare professionals informed me about the advantages and disadvantages of additional services.                                                                                              | 3.1  | 2.5  | 2.9    | 2.9 | 2.9  | 1.9                | 1.9  | 1.9    | 2.0 | 1.9  |
| Item 4 | If necessary, I was given specific contacts where I could get information about additional offers.                                                                                                   | 3.3  | 2.6  | 3.2    | 2.5 | 3.2  | 2.1                | 2.1  | 2.1    | 1.7 | 2.1  |

|        | Item difficulty |      |        |      |      | 'does not concern me' |       |        |       |       | no reply |      |        |      |      | item total correlation |      |        |      |      |
|--------|-----------------|------|--------|------|------|-----------------------|-------|--------|-------|-------|----------|------|--------|------|------|------------------------|------|--------|------|------|
|        | All             | Card | Cancer | Mus  | Ment | All                   | Card  | Cancer | Mus   | Ment  | All      | Card | Cancer | Mus  | Ment | All                    | Card | Cancer | Mus  | Ment |
| Item 1 | 42.3            | 26.9 | 39.5   | 31.5 | 39.5 | 30.4%                 | 54.5% | 23.8%  | 29.0% | 23.8% | 1.1%     | 1.8% | 1.8%   | 0.5% | 1.8% | 0.79                   | 0.82 | 0.82   | 0.74 | 0.82 |
| Item 2 | 70.6            | 47.8 | 67.3   | 69.8 | 67.3 | 57.6%                 | 73.6% | 62.3%  | 55.3% | 62.3% | 1.7%     | 3.2% | 2.6%   | 0.5% | 2.6% | 0.73                   | 0.86 | 0.74   | 0.68 | 0.74 |
| Item 3 | 42.0            | 29.7 | 38.5   | 37.9 | 38.5 | 43.3%                 | 63.2% | 39.9%  | 42.9% | 39.9% | 1.7%     | 2.5% | 3.3%   | 0.5% | 3.3% | 0.78                   | 0.86 | 0.80   | 0.77 | 0.80 |
| Item 4 | 45.3            | 32.7 | 43.4   | 29.4 | 43.4 | 46.2%                 | 64.6% | 44.3%  | 48.4% | 44.3% | 1.9%     | 2.5% | 3.3%   | 0.5% | 3.3% | 0.80                   | 0.85 | 0.87   | 0.69 | 0.87 |

Dimension “Teamwork and teambuilding”

|        |                                                                                                                                          | mean |      |        |     |      | standard deviation |      |        |     |      |
|--------|------------------------------------------------------------------------------------------------------------------------------------------|------|------|--------|-----|------|--------------------|------|--------|-----|------|
| Item   |                                                                                                                                          | All  | Card | Cancer | Mus | Ment | All                | Card | Cancer | Mus | Ment |
| Item 1 | The processes within the team were well organized.                                                                                       | 5.1  | 5.0  | 5.2    | 5.2 | 5.2  | 1.0                | 1.1  | 1.0    | 0.9 | 1.0  |
| Item 2 | The entire outpatient clinic team was responsible and approachable for me.                                                               | 5.0  | 5.1  | 5.3    | 4.8 | 5.3  | 1.2                | 1.1  | 0.9    | 1.4 | 0.9  |
| Item 3 | The outpatient clinic team exchanged information about my current health status (for example, everyone was informed about test results). | 4.6  | 4.7  | 4.9    | 4.2 | 4.9  | 1.4                | 1.3  | 1.2    | 1.6 | 1.2  |
| Item 4 | Various healthcare professionals within the outpatient clinic team have given me contradictory information.                              | 5.1  | 5.2  | 5.1    | 5.0 | 5.1  | 1.4                | 1.4  | 1.4    | 1.4 | 1.4  |

|        |  | Item difficulty |      |        |      |      | 'does not concern me' |       |        |       |       | no reply |      |        |      |      | item total correlation |      |        |      |      |
|--------|--|-----------------|------|--------|------|------|-----------------------|-------|--------|-------|-------|----------|------|--------|------|------|------------------------|------|--------|------|------|
|        |  | All             | Card | Cancer | Mus  | Ment | All                   | Card  | Cancer | Mus   | Ment  | All      | Card | Cancer | Mus  | Ment | All                    | Card | Cancer | Mus  | Ment |
| Item 1 |  | 82.8            | 80.8 | 83.9   | 83.6 | 83.9 | 7.1%                  | 3.6%  | 3.7%   | 2.8%  | 3.7%  | 0.8%     | 1.8% | 0.7%   | 0.5% | 0.7% | 0.53                   | 0.55 | 0.51   | 0.57 | 0.51 |
| Item 2 |  | 80.3            | 81.4 | 85.5   | 75.7 | 85.5 | 12.4%                 | 9.0%  | 5.9%   | 6.5%  | 5.9%  | 1.4%     | 2.5% | 1.5%   | 0.5% | 1.5% | 0.59                   | 0.60 | 0.64   | 0.51 | 0.64 |
| Item 3 |  | 72.0            | 73.9 | 77.2   | 63.3 | 77.2 | 22.2%                 | 15.9% | 10.6%  | 20.3% | 10.6% | 2.1%     | 2.9% | 2.9%   | 1.4% | 2.9% | 0.54                   | 0.52 | 0.51   | 0.53 | 0.51 |
| Item 4 |  | 81.7            | 83.5 | 82.3   | 80.7 | 82.3 | 26.1%                 | 21.3% | 14.7%  | 23.0% | 14.7% | 0.9%     | 1.4% | 1.1%   | 0.5% | 1.1% | 0.28                   | 0.21 | 0.27   | 0.36 | 0.27 |



Dimension “Access to care”

| Item                                                                                                                                     | mean |      |        |     |      | standard deviation |      |        |     |      |
|------------------------------------------------------------------------------------------------------------------------------------------|------|------|--------|-----|------|--------------------|------|--------|-----|------|
|                                                                                                                                          | All  | Card | Cancer | Mus | Ment | All                | Card | Cancer | Mus | Ment |
| Item 1 If I wanted to speak to a physician, they were easily accessible.                                                                 | 4.7  | 4.6  | 5.0    | 4.3 | 5.0  | 1.4                | 1.4  | 1.0    | 1.6 | 1.0  |
| Item 2 I received an appointment in time.                                                                                                | 5.1  | 5.2  | 5.6    | 4.7 | 5.6  | 1.2                | 1.2  | 0.7    | 1.5 | 0.7  |
| Item 3 I was able to easily schedule an appointment at the outpatient clinic (for example, via telephone, e-mail, or website).           | 5.0  | 5.1  | 5.1    | 4.8 | 5.1  | 1.4                | 1.3  | 1.3    | 1.5 | 1.3  |
| Item 4 The scheduled appointments at the outpatient clinic were conveniently timed for me (for example, compatible with work or school). | 5.1  | 5.1  | 5.4    | 5.0 | 5.4  | 1.3                | 1.3  | 1.0    | 1.4 | 1.0  |

|        | Item difficulty |      |        |      |      | 'does not concern me' |       |        |       |       | no reply |      |        |      |      | item total correlation |      |        |      |      |
|--------|-----------------|------|--------|------|------|-----------------------|-------|--------|-------|-------|----------|------|--------|------|------|------------------------|------|--------|------|------|
|        | All             | Card | Cancer | Mus  | Ment | All                   | Card  | Cancer | Mus   | Ment  | All      | Card | Cancer | Mus  | Ment | All                    | Card | Cancer | Mus  | Ment |
| Item 1 | 73.1            | 72.6 | 80.4   | 66.0 | 80.4 | 23.4%                 | 30.7% | 12.8%  | 33.6% | 12.8% | 1.3%     | 1.4% | 2.2%   | 0.5% | 2.2% | 0.54                   | 0.55 | 0.40   | 0.48 | 0.40 |
| Item 2 | 82.5            | 83.9 | 91.8   | 73.4 | 91.8 | 2.1%                  | 3.6%  | 0.7%   | 0.9%  | 0.7%  | 1.4%     | 2.5% | 1.5%   | 0.9% | 1.5% | 0.62                   | 0.55 | 0.53   | 0.67 | 0.53 |
| Item 3 | 79.5            | 81.7 | 82.3   | 75.1 | 82.3 | 9.2%                  | 15.5% | 8.8%   | 4.1%  | 8.8%  | 1.3%     | 1.8% | 2.2%   | 0.5% | 2.2% | 0.57                   | 0.59 | 0.39   | 0.60 | 0.39 |
| Item 4 | 82.7            | 81.2 | 88.1   | 79.1 | 88.1 | 8.6%                  | 13.0% | 7.7%   | 4.6%  | 7.7%  | 0.9%     | 1.1% | 1.5%   | 0.9% | 1.5% | 0.50                   | 0.52 | 0.37   | 0.56 | 0.37 |

Dimension “Coordination and continuity of care”

|        |                                                                                                                            | mean |      |        |     |      | standard deviation |      |        |     |      |
|--------|----------------------------------------------------------------------------------------------------------------------------|------|------|--------|-----|------|--------------------|------|--------|-----|------|
| Item   |                                                                                                                            | All  | Card | Cancer | Mus | Ment | All                | Card | Cancer | Mus | Ment |
| Item 1 | It was discussed with me whether follow-up appointments would be useful (for example, for aftercare or further treatment). | 5.1  | 5.2  | 5.2    | 4.8 | 5.2  | 1.4                | 1.3  | 1.2    | 1.6 | 1.2  |
| Item 2 | I was explained how long I will approximately have to wait and why.                                                        | 3.9  | 3.4  | 3.8    | 3.9 | 3.8  | 1.8                | 1.9  | 1.7    | 1.8 | 1.7  |
| Item 3 | The healthcare professionals took enough time for me.                                                                      | 5.3  | 5.3  | 5.4    | 4.9 | 5.4  | 1.1                | 1.0  | 0.9    | 1.3 | 0.9  |
| Item 4 | Treatment steps were recorded in my treatment plan.                                                                        | 3.5  | 3.8  | 4.3    | 2.8 | 4.3  | 2.0                | 1.9  | 1.8    | 1.9 | 1.8  |

|        |  | Item difficulty |      |        |      |      | 'does not concern me' |       |        |       |       | no reply |      |        |      |      | item total correlation |      |        |      |      |
|--------|--|-----------------|------|--------|------|------|-----------------------|-------|--------|-------|-------|----------|------|--------|------|------|------------------------|------|--------|------|------|
|        |  | All             | Card | Cancer | Mus  | Ment | All                   | Card  | Cancer | Mus   | Ment  | All      | Card | Cancer | Mus  | Ment | All                    | Card | Cancer | Mus  | Ment |
| Item 1 |  | 81.7            | 83.5 | 84.6   | 76.4 | 84.6 | 13.1%                 | 16.2% | 12.8%  | 11.1% | 12.8% | 1.4%     | 0.7% | 3.3%   | 0.0% | 3.3% | 0.43                   | 0.37 | 0.46   | 0.42 | 0.46 |
| Item 2 |  | 57.7            | 47.8 | 55.0   | 58.7 | 55.0 | 11.0%                 | 7.6%  | 9.2%   | 13.8% | 9.2%  | 0.9%     | 0.4% | 2.2%   | 0.0% | 2.2% | 0.35                   | 0.36 | 0.40   | 0.40 | 0.40 |
| Item 3 |  | 85.1            | 85.8 | 87.5   | 78.6 | 87.5 | 0.5%                  | 0.7%  | 0.7%   | 0.5%  | 0.7%  | 0.9%     | 0.4% | 2.2%   | 0.5% | 2.2% | 0.48                   | 0.49 | 0.43   | 0.51 | 0.43 |
| Item 4 |  | 50.1            | 55.4 | 65.5   | 35.7 | 65.5 | 27.2%                 | 34.7% | 19.8%  | 24.9% | 19.8% | 1.5%     | 2.9% | 1.8%   | 0.5% | 1.8% | 0.43                   | 0.46 | 0.52   | 0.41 | 0.52 |

Dimension “Patient safety”

|        |                                                                                                                          | mean |      |        |     |      | standard deviation |      |        |     |      |
|--------|--------------------------------------------------------------------------------------------------------------------------|------|------|--------|-----|------|--------------------|------|--------|-----|------|
| Item   |                                                                                                                          | All  | Card | Cancer | Mus | Ment | All                | Card | Cancer | Mus | Ment |
| Item 1 | I was encouraged to speak up if I noticed inconsistencies in my treatment.                                               | 3.9  | 3.7  | 4.1    | 3.5 | 4.1  | 1.8                | 1.9  | 1.8    | 1.9 | 1.8  |
| Item 2 | I was examined thoroughly and carefully.                                                                                 | 5.1  | 5.4  | 5.2    | 4.9 | 5.2  | 1.2                | 1.0  | 1.2    | 1.4 | 1.2  |
| Item 3 | When I was prescribed new medication, I was asked what other medication I am taking and whether I have any intolerances. | 5.0  | 5.2  | 5.2    | 4.4 | 5.2  | 1.5                | 1.5  | 1.2    | 1.8 | 1.2  |
| Item 4 | I was informed about whom to contact if there was an inconsistency in my treatment or if I wanted to file a complaint.   | 2.3  | 2.1  | 2.6    | 2.0 | 2.6  | 1.7                | 1.6  | 1.7    | 1.6 | 1.7  |

|        |  | Item difficulty |      |        |      |      | 'does not concern me' |       |        |       |       | no reply |      |        |      |      | item total correlation |      |        |      |      |
|--------|--|-----------------|------|--------|------|------|-----------------------|-------|--------|-------|-------|----------|------|--------|------|------|------------------------|------|--------|------|------|
|        |  | All             | Card | Cancer | Mus  | Ment | All                   | Card  | Cancer | Mus   | Ment  | All      | Card | Cancer | Mus  | Ment | All                    | Card | Cancer | Mus  | Ment |
| Item 1 |  | 57.5            | 54.1 | 61.6   | 50.6 | 61.6 | 23.4%                 | 31.0% | 18.3%  | 18.4% | 18.3% | 0.8%     | 0.7% | 1.5%   | 0.9% | 1.5% | 0.57                   | 0.47 | 0.68   | 0.67 | 0.68 |
| Item 2 |  | 81.9            | 88.9 | 84.1   | 77.5 | 84.1 | 16.6%                 | 5.8%  | 10.3%  | 9.2%  | 10.3% | 2.7%     | 3.6% | 2.9%   | 2.3% | 2.9% | 0.41                   | 0.25 | 0.44   | 0.50 | 0.44 |
| Item 3 |  | 79.7            | 83.2 | 84.9   | 68.4 | 84.9 | 41.6%                 | 51.3% | 29.3%  | 40.1% | 29.3% | 1.0%     | 1.4% | 1.1%   | 0.5% | 1.1% | 0.54                   | 0.40 | 0.58   | 0.63 | 0.58 |
| Item 4 |  | 25.9            | 21.8 | 32.0   | 19.9 | 32.0 | 30.7%                 | 39.0% | 24.2%  | 27.2% | 24.2% | 0.9%     | 1.8% | 1.1%   | 0.5% | 1.1% | 0.47                   | 0.47 | 0.50   | 0.47 | 0.50 |

Dimension “Patient information”

| Item                                                                                                                                  | mean |      |        |     |      | standard deviation |      |        |     |      |
|---------------------------------------------------------------------------------------------------------------------------------------|------|------|--------|-----|------|--------------------|------|--------|-----|------|
|                                                                                                                                       | All  | Card | Cancer | Mus | Ment | All                | Card | Cancer | Mus | Ment |
| Item 1 I received information about my condition from my healthcare professionals (for example, causes, symptoms, effects or course). | 4.6  | 4.6  | 4.8    | 4.3 | 4.8  | 1.6                | 1.6  | 1.4    | 1.6 | 1.4  |
| Item 2 I was asked what I already know about my condition.                                                                            | 3.9  | 3.9  | 3.8    | 3.5 | 3.8  | 1.8                | 1.8  | 1.7    | 1.9 | 1.7  |
| Item 3 The significance of my test results was explained to me.                                                                       | 4.8  | 4.8  | 5.1    | 4.5 | 5.1  | 1.5                | 1.6  | 1.2    | 1.6 | 1.2  |
| Item 4 I was asked what I would like to know about my condition.                                                                      | 4.0  | 4.1  | 4.5    | 3.6 | 4.5  | 1.8                | 1.8  | 1.6    | 1.9 | 1.6  |

|        | Item difficulty |      |        |      |      | 'does not concern me' |       |        |       |       | no reply |      |        |      |      | item total correlation |      |        |      |      |
|--------|-----------------|------|--------|------|------|-----------------------|-------|--------|-------|-------|----------|------|--------|------|------|------------------------|------|--------|------|------|
|        | All             | Card | Cancer | Mus  | Ment | All                   | Card  | Cancer | Mus   | Ment  | All      | Card | Cancer | Mus  | Ment | All                    | Card | Cancer | Mus  | Ment |
| Item 1 | 71.1            | 71.1 | 75.6   | 66.3 | 75.6 | 10.9%                 | 15.5% | 10.3%  | 6.5%  | 10.3% | 0.7%     | 1.4% | 0.4%   | 0.9% | 0.4% | 0.71                   | 0.70 | 0.60   | 0.71 | 0.60 |
| Item 2 | 57.1            | 57.7 | 56.7   | 49.8 | 56.7 | 16.1%                 | 24.5% | 17.9%  | 9.7%  | 17.9% | 1.3%     | 1.8% | 1.1%   | 1.4% | 1.1% | 0.66                   | 0.67 | 0.65   | 0.72 | 0.65 |
| Item 3 | 75.3            | 75.8 | 82.1   | 70.1 | 82.1 | 19.2%                 | 9.7%  | 7.0%   | 21.2% | 7.0%  | 1.1%     | 1.8% | 0.4%   | 0.5% | 0.4% | 0.72                   | 0.72 | 0.60   | 0.73 | 0.60 |
| Item 4 | 60.9            | 61.9 | 70.0   | 51.5 | 70.0 | 14.5%                 | 20.6% | 9.9%   | 13.4% | 9.9%  | 1.0%     | 1.4% | 0.7%   | 0.9% | 0.7% | 0.69                   | 0.72 | 0.59   | 0.68 | 0.59 |

Dimension “Patient involvement in care”

|        |                                                                                                                    | mean |      |        |     |      | standard deviation |      |        |     |      |
|--------|--------------------------------------------------------------------------------------------------------------------|------|------|--------|-----|------|--------------------|------|--------|-----|------|
| Item   |                                                                                                                    | All  | Card | Cancer | Mus | Ment | All                | Card | Cancer | Mus | Ment |
| Item 1 | I was an equal partner with my healthcare professionals (for example, in making decisions or sharing information). | 5.0  | 5.0  | 5.0    | 4.8 | 5.0  | 1.2                | 1.1  | 1.1    | 1.5 | 1.1  |
| Item 2 | I was informed about various treatment options and their advantages and disadvantages.                             | 4.3  | 4.4  | 4.5    | 4.0 | 4.5  | 1.7                | 1.7  | 1.6    | 1.9 | 1.6  |
| Item 3 | I was able to participate in the decision-making process as much as I wanted to.                                   | 4.6  | 4.5  | 4.6    | 4.4 | 4.6  | 1.6                | 1.6  | 1.5    | 1.8 | 1.5  |
| Item 4 | When deciding about treatment, it was taken into account what is particularly important to me.                     | 4.5  | 4.4  | 4.4    | 4.4 | 4.4  | 1.6                | 1.6  | 1.6    | 1.8 | 1.6  |

|        |  | Item difficulty |      |        |      |      | 'does not concern me' |       |        |       |       | no reply |      |        |      |      | item total correlation |      |        |      |      |
|--------|--|-----------------|------|--------|------|------|-----------------------|-------|--------|-------|-------|----------|------|--------|------|------|------------------------|------|--------|------|------|
|        |  | All             | Card | Cancer | Mus  | Ment | All                   | Card  | Cancer | Mus   | Ment  | All      | Card | Cancer | Mus  | Ment | All                    | Card | Cancer | Mus  | Ment |
| Item 1 |  | 79.4            | 80.2 | 79.5   | 76.1 | 79.5 | 7.6%                  | 13.7% | 5.1%   | 6.0%  | 5.1%  | 1.3%     | 1.4% | 1.1%   | 1.8% | 1.1% | 0.66                   | 0.71 | 0.62   | 0.77 | 0.62 |
| Item 2 |  | 65.1            | 68.1 | 69.6   | 59.4 | 69.6 | 27.7%                 | 40.8% | 21.2%  | 25.3% | 21.2% | 0.9%     | 1.1% | 0.7%   | 1.4% | 0.7% | 0.66                   | 0.65 | 0.69   | 0.77 | 0.69 |
| Item 3 |  | 72.0            | 70.7 | 72.5   | 67.1 | 72.5 | 25.2%                 | 37.2% | 23.1%  | 20.3% | 23.1% | 1.3%     | 1.8% | 1.1%   | 0.9% | 1.1% | 0.76                   | 0.78 | 0.77   | 0.84 | 0.77 |
| Item 4 |  | 70.8            | 67.4 | 67.5   | 68.9 | 67.5 | 24.8%                 | 40.8% | 24.5%  | 17.1% | 24.5% | 1.1%     | 1.8% | 0.7%   | 0.9% | 0.7% | 0.79                   | 0.82 | 0.79   | 0.88 | 0.79 |

Dimension “Involvement of family and friends”

|        |                                                                                                                                                                                                     | mean |      |        |     |      | standard deviation |      |        |     |      |
|--------|-----------------------------------------------------------------------------------------------------------------------------------------------------------------------------------------------------|------|------|--------|-----|------|--------------------|------|--------|-----|------|
| Item   |                                                                                                                                                                                                     | All  | Card | Cancer | Mus | Ment | All                | Card | Cancer | Mus | Ment |
| Item 1 | I was informed about the options for involving my family members in the treatment (for example, accompanying to appointments, participating in conversations, or assisting with medication intake). | 3.1  | 3.0  | 3.4    | 2.2 | 3.4  | 2.0                | 2.0  | 2.0    | 1.7 | 2.0  |
| Item 2 | If I wanted to, my relatives were asked how much they wanted to be involved in my treatment.                                                                                                        | 3.0  | 3.0  | 3.5    | 2.3 | 3.5  | 2.0                | 2.1  | 2.0    | 1.9 | 2.0  |
| Item 3 | My relatives were given as much information about my condition and my treatment as I wanted to.                                                                                                     | 3.8  | 3.9  | 4.4    | 2.9 | 4.4  | 2.1                | 2.1  | 1.9    | 2.1 | 1.9  |
| Item 4 | My relatives were involved in my treatment as much as I wanted them to be.                                                                                                                          | 4.0  | 4.1  | 4.4    | 2.9 | 4.4  | 2.1                | 2.0  | 1.9    | 2.1 | 1.9  |

|        | Item difficulty |      |        |      |      | 'does not concern me' |       |        |       |       | no reply |      |        |      |      | item total correlation |      |        |      |      |
|--------|-----------------|------|--------|------|------|-----------------------|-------|--------|-------|-------|----------|------|--------|------|------|------------------------|------|--------|------|------|
|        | All             | Card | Cancer | Mus  | Ment | All                   | Card  | Cancer | Mus   | Ment  | All      | Card | Cancer | Mus  | Ment | All                    | Card | Cancer | Mus  | Ment |
| Item 1 | 41.5            | 40.4 | 49.0   | 24.4 | 49.0 | 42.6%                 | 55.2% | 30.8%  | 49.8% | 30.8% | 1.3%     | 1.8% | 2.2%   | 0.5% | 2.2% | 0.80                   | 0.83 | 0.76   | 0.84 | 0.76 |
| Item 2 | 40.9            | 40.1 | 50.1   | 26.0 | 50.1 | 60.6%                 | 67.5% | 49.1%  | 67.3% | 49.1% | 1.5%     | 1.8% | 2.9%   | 0.5% | 2.9% | 0.85                   | 0.84 | 0.82   | 0.90 | 0.82 |
| Item 3 | 56.7            | 58.0 | 68.0   | 38.5 | 68.0 | 57.6%                 | 61.7% | 41.8%  | 69.6% | 41.8% | 1.5%     | 1.8% | 2.6%   | 0.5% | 2.6% | 0.87                   | 0.88 | 0.86   | 0.95 | 0.86 |
| Item 4 | 60.0            | 61.5 | 68.8   | 37.7 | 68.8 | 56.4%                 | 63.5% | 41.8%  | 67.3% | 41.8% | 1.6%     | 1.8% | 3.3%   | 0.9% | 3.3% | 0.83                   | 0.83 | 0.83   | 0.94 | 0.83 |

Dimension “Patient empowerment”

|        |                                                                                                                                   | mean |      |        |     |      | standard deviation |      |        |     |      |
|--------|-----------------------------------------------------------------------------------------------------------------------------------|------|------|--------|-----|------|--------------------|------|--------|-----|------|
| Item   |                                                                                                                                   | All  | Card | Cancer | Mus | Ment | All                | Card | Cancer | Mus | Ment |
| Item 1 | I was encouraged to improve my health by changing my behavior (for example, through diet, exercise, reducing tobacco or alcohol). | 4.0  | 3.5  | 3.9    | 3.9 | 3.9  | 1.8                | 1.9  | 1.8    | 1.7 | 1.8  |
| Item 2 | I was encouraged to ask questions.                                                                                                | 4.6  | 4.5  | 4.8    | 4.2 | 4.8  | 1.5                | 1.5  | 1.3    | 1.6 | 1.3  |
| Item 3 | I was explained where to find understandable and scientifically based information about my health.                                | 3.1  | 2.7  | 3.4    | 2.8 | 3.4  | 1.8                | 1.8  | 1.7    | 1.8 | 1.7  |
| Item 4 | If needed, realistic goals for my health were agreed upon (for example, going for a walk every day, eating fruits every day).     | 3.6  | 3.0  | 3.3    | 3.4 | 3.3  | 1.8                | 1.9  | 1.8    | 1.9 | 1.8  |

|        |  | Item difficulty |      |        |      |      | 'does not concern me' |       |        |       |       | no reply |      |        |      |      | item total correlation |      |        |      |      |
|--------|--|-----------------|------|--------|------|------|-----------------------|-------|--------|-------|-------|----------|------|--------|------|------|------------------------|------|--------|------|------|
|        |  | All             | Card | Cancer | Mus  | Ment | All                   | Card  | Cancer | Mus   | Ment  | All      | Card | Cancer | Mus  | Ment | All                    | Card | Cancer | Mus  | Ment |
| Item 1 |  | 60.9            | 50.7 | 58.6   | 58.9 | 58.6 | 26.0%                 | 40.1% | 27.1%  | 18.9% | 27.1% | 0.8%     | 1.1% | 1.1%   | 0.9% | 1.1% | 0.72                   | 0.68 | 0.78   | 0.68 | 0.78 |
| Item 2 |  | 72.0            | 70.7 | 75.3   | 64.8 | 75.3 | 9.7%                  | 16.6% | 8.8%   | 6.9%  | 8.8%  | 1.5%     | 1.4% | 2.9%   | 1.4% | 2.9% | 0.57                   | 0.55 | 0.53   | 0.66 | 0.53 |
| Item 3 |  | 42.5            | 34.0 | 47.1   | 36.7 | 47.1 | 21.9%                 | 36.8% | 17.2%  | 19.4% | 17.2% | 2.0%     | 2.2% | 2.6%   | 1.4% | 2.6% | 0.65                   | 0.66 | 0.72   | 0.57 | 0.72 |
| Item 4 |  | 51.1            | 40.6 | 46.9   | 48.9 | 46.9 | 35.7%                 | 53.8% | 34.1%  | 30.9% | 34.1% | 0.8%     | 1.1% | 1.1%   | 0.9% | 1.1% | 0.74                   | 0.79 | 0.76   | 0.70 | 0.76 |

Dimension “Physical support”

| Item                                                                                                                                      | mean |      |        |     |      | standard deviation |      |        |     |      |
|-------------------------------------------------------------------------------------------------------------------------------------------|------|------|--------|-----|------|--------------------|------|--------|-----|------|
|                                                                                                                                           | All  | Card | Cancer | Mus | Ment | All                | Card | Cancer | Mus | Ment |
| Item 1 When I had pain, I was helped quickly.                                                                                             | 4.8  | 5.0  | 5.3    | 4.5 | 5.3  | 1.4                | 1.4  | 0.9    | 1.4 | 0.9  |
| Item 2 If I had physical complaints, I was helped quickly (for example with nausea or restlessness).                                      | 4.7  | 4.9  | 5.2    | 4.4 | 5.2  | 1.4                | 1.4  | 1.1    | 1.5 | 1.1  |
| Item 3 I was examined and treated cautiously (for example when giving injections, changing dressings, or washing).                        | 5.3  | 5.3  | 5.4    | 5.2 | 5.4  | 1.0                | 1.1  | 0.9    | 1.0 | 0.9  |
| Item 4 If needed, I was asked whether I needed help with everyday tasks (for example, from a care service, home help, or walking frames). | 3.2  | 3.2  | 3.5    | 2.6 | 3.5  | 1.9                | 2.0  | 1.9    | 1.8 | 1.9  |

|        | Item difficulty |      |        |      |      | 'does not concern me' |       |        |       |       | no reply |      |        |      |      | item total correlation |      |        |      |      |
|--------|-----------------|------|--------|------|------|-----------------------|-------|--------|-------|-------|----------|------|--------|------|------|------------------------|------|--------|------|------|
|        | All             | Card | Cancer | Mus  | Ment | All                   | Card  | Cancer | Mus   | Ment  | All      | Card | Cancer | Mus  | Ment | All                    | Card | Cancer | Mus  | Ment |
| Item 1 | 75.8            | 79.5 | 86.0   | 69.1 | 86.0 | 54.8%                 | 69.7% | 52.7%  | 19.8% | 52.7% | 1.0%     | 1.1% | 1.8%   | 0.9% | 1.8% | 0.66                   | 0.61 | 0.61   | 0.64 | 0.61 |
| Item 2 | 75.0            | 77.9 | 83.2   | 68.3 | 83.2 | 56.7%                 | 71.1% | 48.0%  | 45.6% | 48.0% | 1.2%     | 1.1% | 1.5%   | 0.9% | 1.5% | 0.71                   | 0.76 | 0.49   | 0.74 | 0.49 |
| Item 3 | 86.6            | 86.0 | 88.8   | 84.6 | 88.8 | 40.4%                 | 41.5% | 16.8%  | 26.7% | 16.8% | 0.8%     | 0.7% | 1.1%   | 0.9% | 1.1% | 0.44                   | 0.42 | 0.40   | 0.42 | 0.40 |
| Item 4 | 44.2            | 43.9 | 50.1   | 32.7 | 50.1 | 67.6%                 | 78.7% | 59.0%  | 59.9% | 59.0% | 0.8%     | 1.1% | 1.1%   | 0.9% | 1.1% | 0.41                   | 0.47 | 0.41   | 0.41 | 0.41 |



Dimension “Emotional support”

|        |                                                                                                                                   | mean |      |        |     |      | standard deviation |      |        |     |      |
|--------|-----------------------------------------------------------------------------------------------------------------------------------|------|------|--------|-----|------|--------------------|------|--------|-----|------|
| Item   |                                                                                                                                   | All  | Card | Cancer | Mus | Ment | All                | Card | Cancer | Mus | Ment |
| Item 1 | The healthcare professionals addressed my fears and concerns (for example, by showing understanding and providing encouragement). | 4.4  | 3.8  | 4.2    | 3.9 | 4.2  | 1.7                | 1.9  | 1.6    | 1.7 | 1.6  |
| Item 2 | I had the opportunity to talk to my healthcare professionals about my feelings.                                                   | 4.4  | 3.9  | 4.2    | 3.9 | 4.2  | 1.7                | 1.8  | 1.6    | 1.7 | 1.6  |
| Item 3 | I was encouraged to talk about my feelings.                                                                                       | 3.8  | 3.2  | 3.4    | 3.1 | 3.4  | 1.9                | 1.8  | 1.8    | 1.8 | 1.8  |
| Item 4 | I was asked whether I would like psychological support (for example, psychological counselling, psychotherapy, or pastoral care). | 3.5  | 2.2  | 3.6    | 2.3 | 3.6  | 2.1                | 1.7  | 2.0    | 1.8 | 2.0  |

|        |  | Item difficulty |      |        |      |      | 'does not concern me' |       |        |       |       | no reply |      |        |      |      | item total correlation |      |        |      |      |
|--------|--|-----------------|------|--------|------|------|-----------------------|-------|--------|-------|-------|----------|------|--------|------|------|------------------------|------|--------|------|------|
|        |  | All             | Card | Cancer | Mus  | Ment | All                   | Card  | Cancer | Mus   | Ment  | All      | Card | Cancer | Mus  | Ment | All                    | Card | Cancer | Mus  | Ment |
| Item 1 |  | 67.8            | 56.9 | 63.2   | 58.6 | 63.2 | 19.2%                 | 36.1% | 18.7%  | 19.4% | 18.7% | 0.8%     | 0.7% | 1.5%   | 0.5% | 1.5% | 0.85                   | 0.85 | 0.85   | 0.81 | 0.85 |
| Item 2 |  | 69.0            | 57.0 | 64.6   | 57.5 | 64.6 | 16.8%                 | 33.6% | 14.3%  | 17.1% | 14.3% | 0.7%     | 1.1% | 1.1%   | 0.5% | 1.1% | 0.84                   | 0.83 | 0.79   | 0.83 | 0.79 |
| Item 3 |  | 56.8            | 43.0 | 47.8   | 42.1 | 47.8 | 17.9%                 | 33.2% | 16.1%  | 19.8% | 16.1% | 1.3%     | 2.2% | 1.5%   | 0.9% | 1.5% | 0.87                   | 0.85 | 0.83   | 0.86 | 0.83 |
| Item 4 |  | 49.6            | 23.1 | 52.4   | 26.5 | 52.4 | 31.5%                 | 52.3% | 21.6%  | 33.2% | 21.6% | 0.9%     | 1.1% | 1.5%   | 0.5% | 1.5% | 0.66                   | 0.62 | 0.61   | 0.49 | 0.61 |
